# Supplementary material for: Synthetic quorum-sensing circuit to control consortial biofilm formation and dispersal in a microfluidic device
Source: PubMed Central journal article supplement — Nat Commun. 2012 Jan 3;3:613–. doi: 10.1038/ncomms1616 (PMC3272573; doi:10.1038/ncomms1616), 2012-01-03
Supplement: ncomms1616-s2.pdf [file ncomms1616-s2.pdf]

## **Supplementary Information**

### **Synthetic Quorum Sensing Circuit to Control Consortial Biofilm Formation and Dispersal in a Microfluidic Device**

Seok Hoon Hong\*, Manjunath Hegde\*, Jeongyun Kim\*, Xiaoxue Wang, Arul Jayaraman<sup>Δ</sup>, and

Thomas K. Wood<sup>Δ</sup>

Department of Chemical Engineering, Texas A & M University, College Station, Texas 77843-3122

\* These authors contributed equally to this work.

<sup>Δ</sup> To whom correspondence should be addressed:

T.K. Wood (Thomas.Wood@chemail.tamu.edu), Tel: (+1) 979 862 1588, Fax (+1) 979 845 6446

A. Jayaraman (arulj@mail.che.tamu.edu), Tel: (+1) 979 845 3306, Fax (+1) 979 845 6446

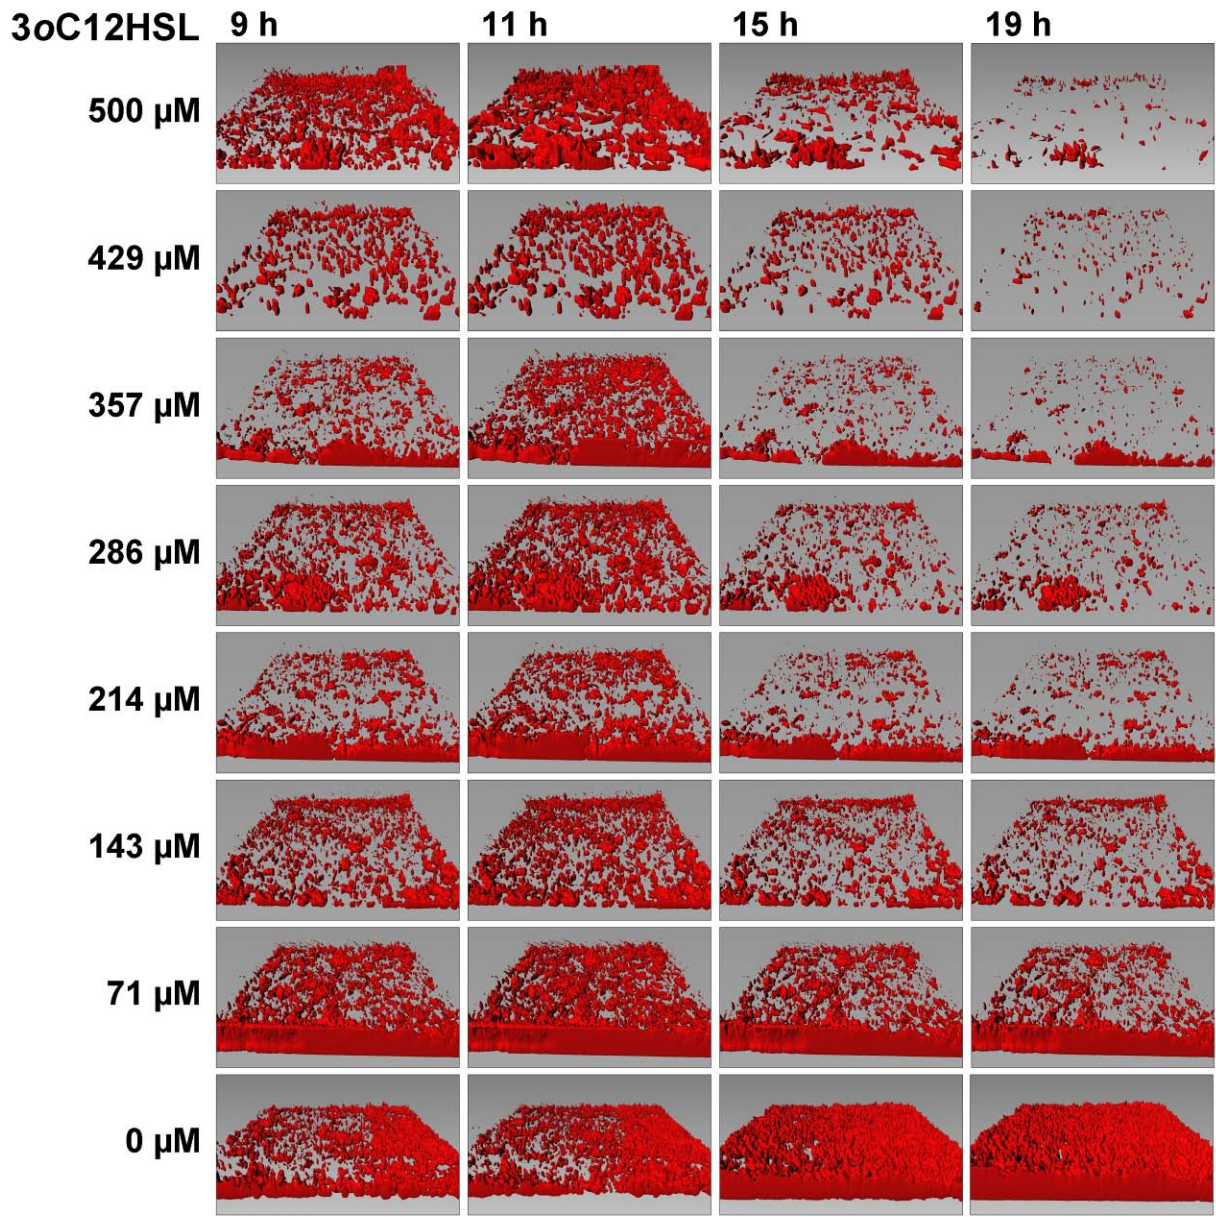

**Supplementary Figure S1. Dispersal of the initial colonizer biofilm with different concentrations of 3oC12HSL.** Robust biofilms of initial colonizer (*lasR*<sup>+</sup>, *bdcAE50Q*<sup>+</sup>, *rfp*<sup>+</sup> via *E. coli hha/pBdcAE50Q-rfp-lasR*) cells were developed for 9 h in each microchamber. Different concentrations of 3oC2HSL (0, 71, 143, 214, 286, 357, 429, and 500  $\mu\text{M}$ ) were added for 10 h to induce biofilm dispersal. Scale bar indicates 20  $\mu\text{m}$ . Three independent cultures were tested, and representative images are shown.

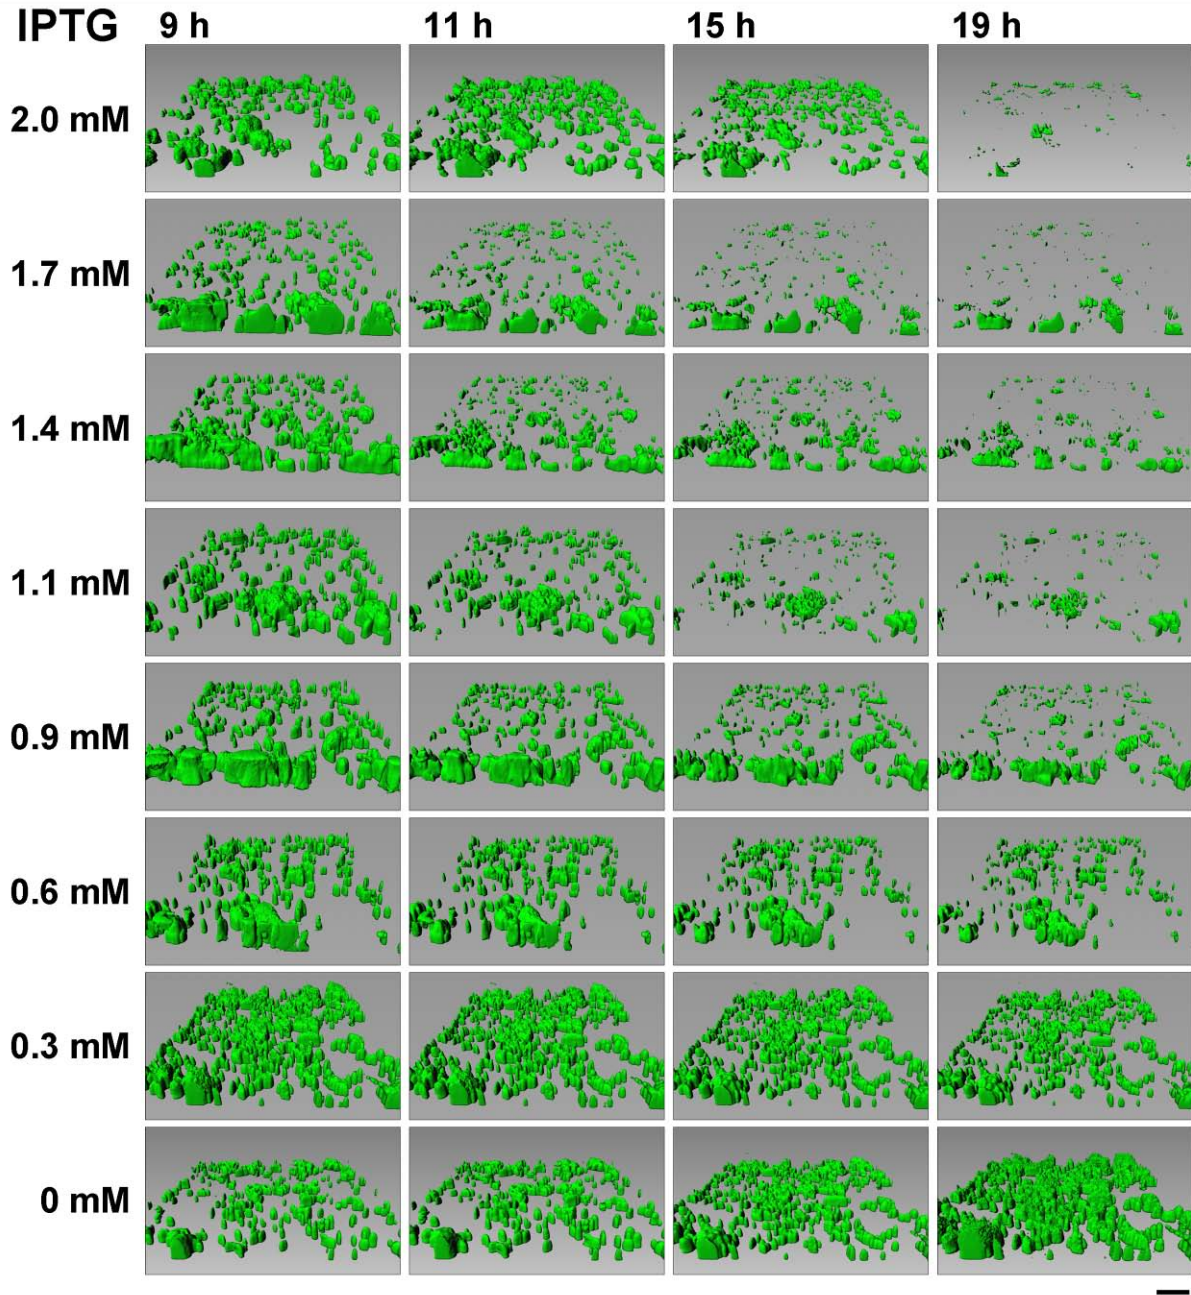

**Supplementary Figure S2. Dispersal of the disperser biofilm with different concentrations of IPTG.** Robust biofilms of disperser cells (*lasI*<sup>+</sup>, *hha13D6*<sup>+</sup>, *gfp*<sup>+</sup> via *E. coli hha/pHha13D6-gfp-lasI*) were developed for 9 h in each microchamber. Different concentrations of IPTG (0, 0.3, 0.6, 0.9, 1.1, 1.4, 1.7, and 2.0 mM) were added for 10 h to induce biofilm dispersal. Scale bar indicates 20 μm. Three independent cultures were tested, and representative images are shown.

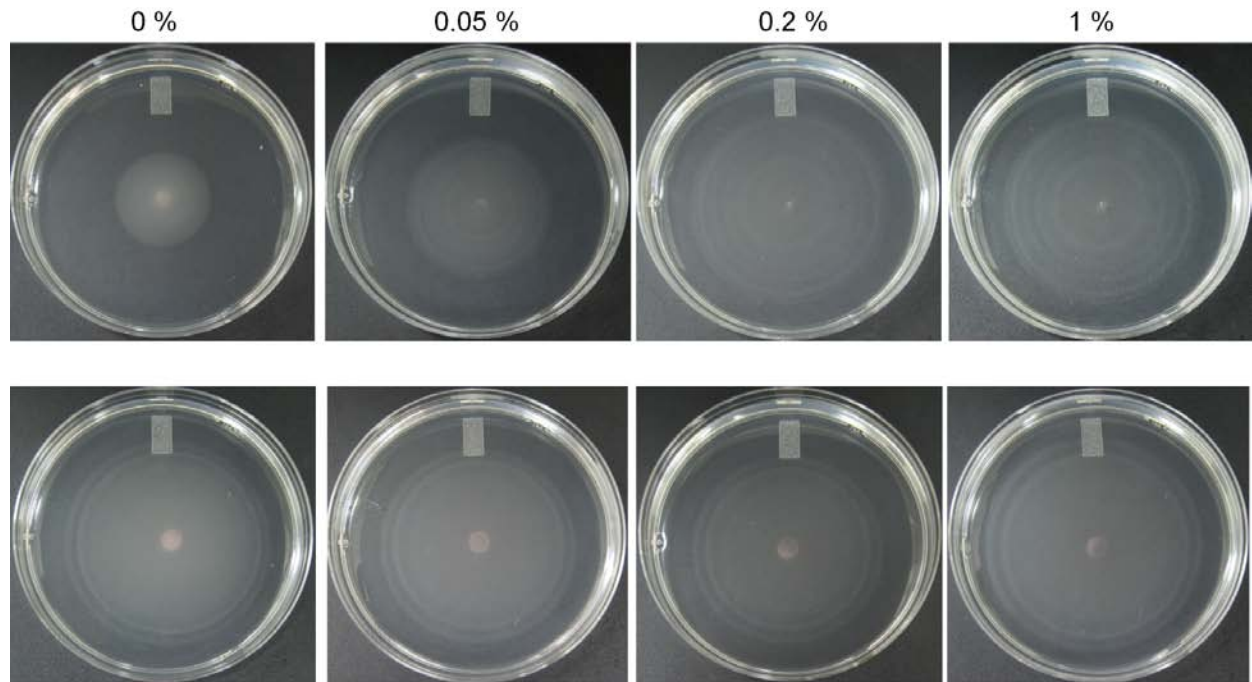

**Supplementary Figure S3. Swimming motility for the two initial colonizer strains with arabinose.** *E. coli* *hha/pPBAD-bdcAE50Q-rfp-lasR* (upper panel) and *E. coli* *hha/pBdcAE50Q-rfp-lasR* (lower panel, negative control) were inoculated and incubated for 16 h with different concentrations of arabinose (0, 0.05, 0.2, and 1%) on motility agar plates at 37°C. Three independent cultures were tested, and representative images are shown.

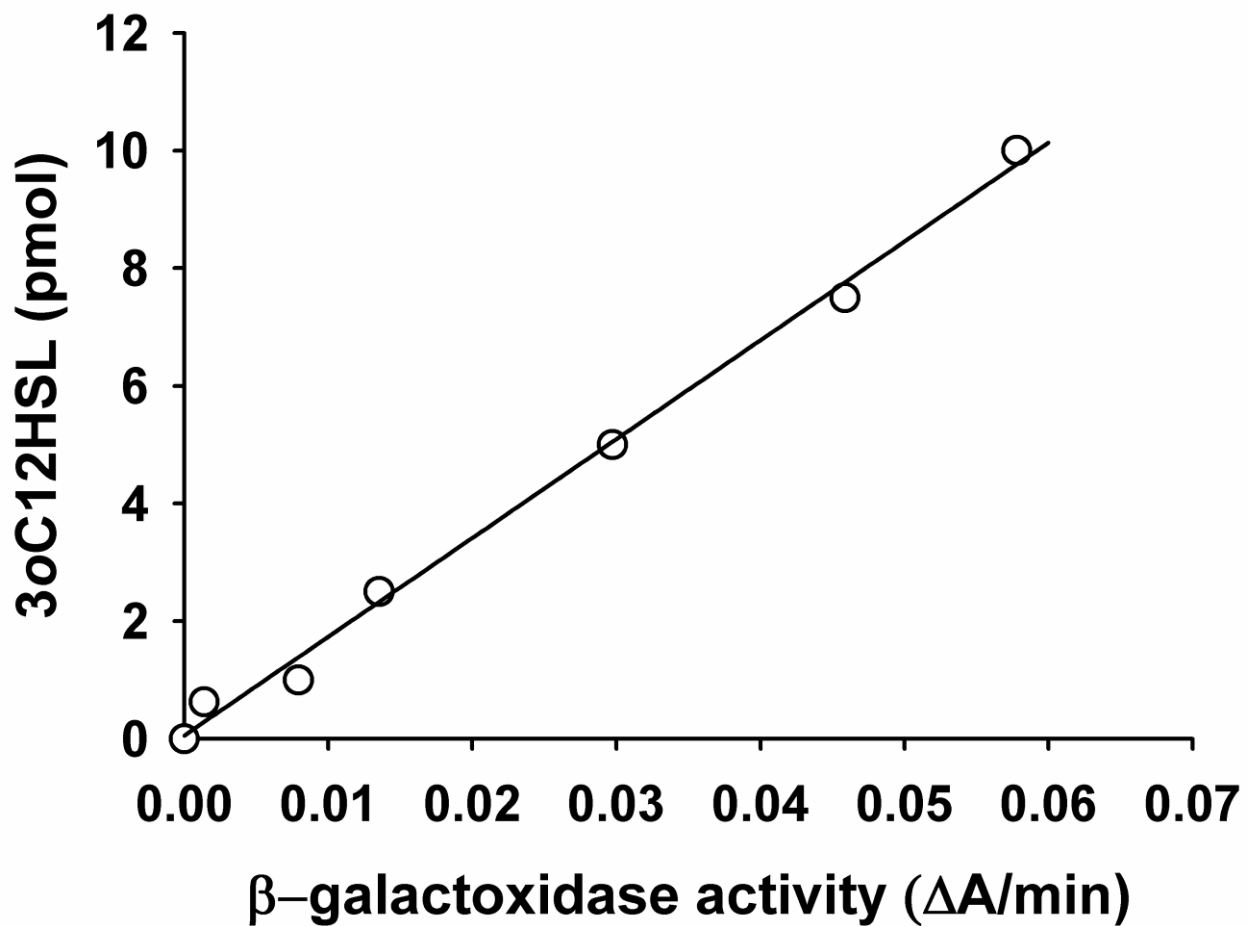

**Supplementary Figure S4. Standard curve for determining 3oC12HSL concentrations.**  $\beta$ -galactosidase activity was measured using reporter *E. coli* MG4/pKDT17 upon adding different amounts of 3oC12HSL.

**Supplementary Table S1.** Strains and plasmids used in this study. Km<sup>R</sup>, Cm<sup>R</sup>, Em<sup>R</sup>, and Ap<sup>R</sup> are kanamycin, chloramphenicol, erythromycin, and ampicillin resistance, respectively.

| Strains and plasmids            | Genotype/relevant characteristics                                                     | Source       |
|---------------------------------|---------------------------------------------------------------------------------------|--------------|
| <b>Strains</b>                  |                                                                                       |              |
| <i>E. coli hha</i>              | BW25113 $\Delta hha$ $\Omega$ Km <sup>R</sup>                                         | 51           |
| <i>E. coli</i> MG4/pKDT17       | Ap <sup>R</sup> ; $P_{lasB}::lasB^+ - lacZ^+$ translational fusion, $P_{lac}::lasR^+$ | 52           |
| <i>P. aeruginosa</i> PAO1       | Wild-type                                                                             | T. McDermott |
| <b>Plasmids</b>                 |                                                                                       |              |
| pCA24N- <i>hha13D6</i>          | Cm <sup>R</sup> ; $lacI^q$ , pCA24N $P_{T5-lac}::hha13D6^+$                           | 53           |
| pHha13D6- <i>gfp</i>            | Cm <sup>R</sup> ; $lacI^q$ , pCA24N $P_{T5-lac}::hha13D6^+ P_{CP25}::gfp^+$           | This study   |
| pHha13D6- <i>gfp-lasI</i>       | Cm <sup>R</sup> ; $lacI^q$ , pCA24N $P_{T5-lac}::hha13D6^+ P_{CP25}::gfp^+ - lasI^+$  | This study   |
| pCA24N- <i>bdcAE50Q</i>         | Cm <sup>R</sup> ; $lacI^q$ , pCA24N $P_{T5-lac}::bdcAE50Q^+$                          | 54           |
| pBdcAE50Q                       | Cm <sup>R</sup> ; $lacI^q$ , pCA24N $P_{lasI}::bdcAE50Q^+$                            | This study   |
| pBdcAE50Q- <i>rfp-lasR</i>      | Cm <sup>R</sup> ; $lacI^q$ , pCA24N $P_{lasI}::bdcAE50Q^+ P_{CP25}::rfp^+ - lasR^+$   | This study   |
| pCM18                           | Em <sup>R</sup> ; $P_{CP25}::gfp^+$                                                   | 55           |
| pGFP- <i>lasI</i>               | Em <sup>R</sup> ; $P_{CP25}::gfp^+ - lasI^+$                                          | This study   |
| pCM18-X                         | Em <sup>R</sup> ; <i>gfp</i> -disrupted                                               | This study   |
| pRFP- <i>lasR</i>               | Em <sup>R</sup> ; $P_{CP25}::rfp^+ - lasR^+$                                          | This study   |
| pDsRed-Express                  | Ap <sup>R</sup> ; $P_{lac}::rfp^+$                                                    | Clontech     |
| pDsRed- <i>lasR</i>             | Ap <sup>R</sup> ; $P_{lac}::rfp^+ - lasR^+$                                           | This study   |
| pDsRed-BlpIX- <i>lasR</i>       | Ap <sup>R</sup> ; $P_{lac}::rfp^+ - lasR^+$ (BlpI site disrupted)                     | This study   |
| pBAD/Myc-HisC                   | Ap <sup>R</sup> ; <i>araC</i>                                                         | Invitrogen   |
| pPBAD- <i>bdcAE50Q</i>          | Cm <sup>R</sup> ; $lacI^q$ , pCA24N $P_{BAD}::bdcAE50Q^+$                             | This study   |
| pPBAD- <i>bdcAE50Q-rfp-lasR</i> | Cm <sup>R</sup> ; $lacI^q$ , pCA24N $P_{BAD}::bdcAE50Q^+ P_{CP25}::rfp^+ - lasR^+$    | This study   |
| pPBAD- <i>hha13D6-gfp-lasI</i>  | Cm <sup>R</sup> ; $lacI^q$ , pCA24N $P_{BAD}::hha13D6^+ P_{CP25}::gfp^+ - lasI^+$     | This study   |

**Supplementary Table S2.** Primers used for constructing plasmids for the microfluidic biofilm engineering circuit. Underlined italic text indicates the restriction enzyme sites: *Ava*I in *plas*I-F and *pBAD-Ava*I-F, *Blp*I in *las*I-F, *las*I-R, *rfp-las*R-F1, *rfp-las*R-F3, and *rfp-las*R-R, *Bse*RI in *plas*I-R and *pBAD-Bse*RI-R, and *Not*I in *gfp*-F1, *las*R-F, and *las*R-R. Italicized bold text indicates the site-directed mutation for disruption of the *Blp*I restriction site (5'-GCTGAGC to 5'-TCTGAGC) in *Blp*I-X-F and *Blp*I-X-R. Underlined bold text indicates the site-directed mutation site for the codon corresponding to truncation at GFP Y66 (5'-TAT to 5'-TAA for Y66X) in *gfp*X-F and *gfp*X-R.

| Primer Name                                                                                   | Primer Sequence (listed 5' to 3')                                                 |
|-----------------------------------------------------------------------------------------------|-----------------------------------------------------------------------------------|
| <b>Construction of the plasmid for the disperser cell (pHha13D6-<i>gfp-lasI</i>)</b>          |                                                                                   |
| <i>gfp</i> -F1                                                                                | GGACTC <u><i>CGCGCCGCT</i></u> AAGGGCTTTGGCAGTTTATTCTTGACATGTAGTGA<br>GGGGGCTGGT  |
| <i>gfp</i> -F2                                                                                | ACATGTAGTGAGGGGGCTGGTATAATAAAATAGTACTGTTTCGGGTGAGCG<br>GATAACAATT                 |
| <i>gfp</i> -F3                                                                                | TTCGGGTGAGCGGATAACAATTCACACAGGAAACAGCTATGCGTAAAG<br>GAGAAGAACTT                   |
| <i>gfp</i> -R                                                                                 | ATCAACGGTGGTATATCCAGTG                                                            |
| <i>las</i> I-F                                                                                | CCTGC <u><i>AGCTGAGCT</i></u> TCTTCAGCTTCCTATTTGGAGGAAGTG                         |
| <i>las</i> I-R                                                                                | GCTCGAC <u><i>GGCTCAGC</i></u> AGGTCCCCGTCATGAAACCGCCAGTCGC                       |
| <b>Construction of the plasmid for the initial colonizer cell (pBdcAE50Q-<i>rfp-lasR</i>)</b> |                                                                                   |
| <i>plas</i> I-F                                                                               | CGACGCCG <u><i>CTCGAG</i></u> GGGGCTGTGTTCTCTCGTGTG                               |
| <i>plas</i> I-R                                                                               | GCCGTGC <u><i>ATAGTTAATTTCTCCT</i></u> CTTTAATGGAAGCTGAAGAATTTATGC                |
| <i>las</i> R-F                                                                                | GCACCT <u><i>GCGGCCGCT</i></u> AGTTTAAGAAGAACGTAGCGCTATGGCCTTGGTTG<br>ACGGTTTTTC  |
| <i>las</i> R-R                                                                                | GCCTGAC <u><i>GCGGCCGCT</i></u> CAGAGAGTAATAAGACCCAAATTAAC                        |
| <i>Blp</i> I-X-F                                                                              | GTGCTCGCGGCGAACTCGGCG <u><i>CTGAGC</i></u> CTCAGCGTGGAAGCGG                       |
| <i>Blp</i> I-X-R                                                                              | CCGCTTCCACGCTGAG <u><i>GCTCAG</i></u> AGCGCCGAGTTCGCCGCGAGCAC                     |
| <i>Blp</i> I-X-seq-F                                                                          | GAACGCCTTCATCGTCGGCAACTACC                                                        |
| <i>rfp-las</i> R-F1                                                                           | GGACTC <u><i>GCTGAGCG</i></u> GCTTTGGCAGTTTATTCTTGACATGTAGTGAGGGGGCT<br>GGTATAATA |
| <i>rfp-las</i> R-F2                                                                           | GTGAGGGGGCTGGTATAATAAAATAGTACTGTTTCGGGTGAGCGGATAAC<br>AATTCACAC                   |
| <i>rfp-las</i> R-F3                                                                           | CCGGACT <u><i>CGCTGAGC</i></u> ATAACAATTCACACAGGAAACAGCTATGACCATG<br>ATTACGC      |
| <i>rfp-las</i> R-R                                                                            | GCTCGAC <u><i>GGCTCAGC</i></u> AGGTCCCCGCTCAGAGAGTAATAAGACCC                      |
| <i>gfp</i> X-F                                                                                | CAACACTTGTCACTACTTTTCGGT <u><i>TAA</i></u> GGTGTTCATGCTTTGCGAGATAC                |
| <i>gfp</i> X-R                                                                                | GTATCTCGCAAAGCATTGAACAC <u><i>CTTA</i></u> ACCGAAAGTAGTGACAAGTGTTG                |
| <b>Replacing the <i>lasI</i> and <i>T5-lac</i> promoters with the <i>araBAD</i> promoter</b>  |                                                                                   |
| <i>pBAD-Ava</i> I-F                                                                           | CGACGCCG <u><i>CTCGAG</i></u> AAACCAATTGTCCATATTGC                                |
| <i>pBAD-Bse</i> RI-R                                                                          | GCCGTGC <u><i>ATAGTTAATTTCTCCT</i></u> CTTTAATCAGTAGAGAGTTGCGATAAAAA<br>GCG       |

## SUPPLEMENTARY METHODS

**Confocal microscopy.** Images were taken every 1 to 2 h using a 40X/0.85 NA dry objective with a TCS SP5 scanning confocal laser microscope (Leica Microsystems, Wetzlar, Germany)<sup>56</sup>. Z-stack images were taken at a zoom level of 2 such that the image covered 90% of the width of the microchamber. Two individual positions per microchamber covering a total of 70% of the channel length were chosen for imaging. Using the confocal z-stack images, 3-D reconstruction of the biofilm architecture was performed using IMARIS 3D and 4D Real-Time Interactive Data Visualization software (Bitplane Inc., CT, USA). Biomass and average biofilm height were obtained using COMSTAT image-processing software<sup>57</sup>.

**Flow-cell biofilm experiments and biofilm volume analysis.** Overnight cultures were diluted to a turbidity at 600 nm of 0.05 in LB-glucose and pumped through the flow-cell (BST model FC81, Biosurface Technologies, MT, USA) at 10 mL/h for 2 h, then LB-glucose was pumped for 48 h to form biofilms. The biofilms on the glass slides were visualized after robust biofilms were formed (48 h) using a confocal microscope. COMSTAT was used to analyze the biofilms formed at 13 positions. Biofilm volume was calculated by multiplying biofilm biomass and the surface area (1400 mm<sup>2</sup>) of the flow-cell; biofilm volume of *E. coli hha/pHha13D6-gfp-lasI* in the flow-cell was less than 0.01 mm<sup>3</sup>.

**Replacing the *lasI* and *T5-lac* promoters with the *araBAD* promoter.** To construct a plasmid with *bdcAE50Q* controlled by arabinose, the *lasI* promoter of pBdcAE50Q was replaced with the *araBAD* promoter by amplifying this promoter from pBAD/*Myc*-HisC (Invitrogen, CA, USA) using the pBAD-AvaI-F and pBAD-BseRI-R primers. The PCR fragment was cloned into the AvaI and BseRI restriction sites to construct pPBAD-*bdcAE40Q*. The *P<sub>CP25-rfp-lasR</sub>* DNA sequence was amplified from pBdcAE50Q-*rfp-lasR* using the *rfp-lasR*-F1 and *rfp-lasR*-R primers, and the PCR fragment was cloned downstream of *bdcAE50Q* of pPBAD-*bdcAE50Q* using the BlnI restriction site. The final construct, pPBAD-*bdcAE50Q-rfp-lasR*, is identical to pBdcAE50Q-*rfp-lasR* (used for the initial colonizer strain) except that the *araBAD* promoter replaces the *lasI* promoter. The promoter replacement and the *P<sub>CP25-rfp-lasR</sub>* insertion were confirmed by PCR and DNA sequencing.

To replace the somewhat leaky *T5-lac* promoter in pHha13D6-*gfp-lasI* with the *araBAD* promoter,



the *araBAD* promoter PCR fragment obtained using the pBAD-AvaI-F and pBAD-BseRI-R primers was cloned into the AvaI and BseRI restriction sites of pHha13D6-*gfp-lasI* to form the final construct pPBAD-*hha13D6-gfp-lasI*. The promoter replacement was confirmed by DNA sequencing.

**3oC12HSL assay in biofilms.** The flow-cell was disassembled, and biofilms samples were collected by wiping the coverslip, glass slides, and four sides of the flow-cell with paper towels (Kimwipes, 1.5 cm × 1.5 cm). This was repeated three times to ensure all of the biofilm cells were collected. The biofilm cells were resuspended in 5 mL of dH<sub>2</sub>O, mixed, and centrifuged. The biofilm cells were resuspended in 3 mL of dH<sub>2</sub>O and sonicated twice using a 60 Sonic Dismembrator (Fisher Scientific, PA, USA) at level 10 for 15 sec. 3oC12HSL was extracted<sup>58</sup> three times with a half volume of dichloromethane. The aqueous residue was removed after freezing the samples for 3 h at -20°C. The solvent was evaporated via rotary evaporation, and the residue was resuspended in 200 µL of ethyl acetate. *E. coli* MG4/pKDT17 was used to assay the 3oC12HSL levels<sup>52</sup>. This reporter strain contains a copy of the *lasR* gene as well as a *lasB::lacZ* fusion. β-galactosidase activity was measured<sup>59</sup> at 25°C based on the conversion of *o*-nitrophenyl-β-D-galactopyranoside to *o*-nitrophenol. Since the maximum 3oC12HSL detection limit by *E. coli* MG4/pKDT17 was measured as approximately 10 pmol using synthetic 3oC12HSL (Sigma-Aldrich, MO, USA) as the standard (**Supplementary Fig. S4**), 3oC12HSL samples were diluted to the picomolar range. Planktonic cultures of *E. coli hha/pHha13D6-gfp*, which does not produce 3oC12HSL, was used as a negative control. As additional controls, effluent from the flow-cell and planktonic cultures were used to compare with 3oC12HSL concentrations from the biofilm. Three independent cultures were used to assay 3oC12HSL concentrations in biofilms using the flow-cell device.

**Swimming motility assay.** To confirm that the plasmid was functional, swimming motility of *E. coli hha/pPBAD-bdcAE50Q-rfp-lasR* was examined on motility agar plates (1% tryptone, 0.25% NaCl, and 0.3% agar) with different concentrations of arabinose (0, 0.05, 0.1, and 0.2%). Chloramphenicol (30 µg/mL) was added to maintain the plasmid. Overnight cultures (8 µL) were used to inoculate the motility plates, and the swimming halo was measured after 16 h at 37°C.

## SUPPLEMENTARY REFERENCES

51. Baba, T. et al. Construction of *Escherichia coli* K-12 in-frame, single-gene knockout mutants: the Keio collection. *Mol Syst Biol* **2**, 2006.0008 (2006).
52. Pearson, J.P. et al. Structure of the autoinducer required for expression of *Pseudomonas aeruginosa* virulence genes. *Proc Natl Acad Sci U S A* **91**, 197-201 (1994).
53. Hong, S.H., Lee, J. & Wood, T.K. Engineering global regulator Hha of *Escherichia coli* to control biofilm dispersal. *Microb Biotechnol* **3**, 717-728 (2010).
54. Ma, Q., Yang, Z., Pu, M., Peti, W. & Wood, T.K. Engineering a novel c-di-GMP-binding protein for biofilm dispersal. *Environ Microbiol* **13**, 631-642 (2011).
55. Hansen, M.C., Palmer, R.J., Jr, Udsen, C., White, D.C. & Molin, S. Assessment of GFP fluorescence in cells of *Streptococcus gordonii* under conditions of low pH and low oxygen concentration. *Microbiology* **147**, 1383-1391 (2001).
56. Lee, J., Jayaraman, A. & Wood, T.K. Indole is an inter-species biofilm signal mediated by SdiA. *BMC Microbiol* **7**, 42 (2007).
57. Heydorn, A. et al. Quantification of biofilm structures by the novel computer program COMSTAT. *Microbiology* **146**, 2395-2407 (2000).
58. Erickson, D.L. et al. *Pseudomonas aeruginosa* quorum-sensing systems may control virulence factor expression in the lungs of patients with cystic fibrosis. *Infect Immun* **70**, 1783-1790 (2002).
59. Wood, T.K. & Peretti, S.W. Effect of chemically-induced, cloned-gene expression on protein synthesis in *E. coli*. *Biotechnol Bioeng* **38**, 397-412 (1991).
